# Supplementary material for: Ras–MEK Signaling Mediates a Critical Chk1-Dependent DNA Damage Response in Cancer Cells
Source: Oxford University Press journal article supplement (doi:10.1158/1535-7163.mct-16-0504), 2017-01-30
Supplement: 15357163mct160504-sup-169827_1_supp_3776760_hhxb6h.docx [file 15357163mct160504-sup-169827_1_supp_3776760_hhxb6h.docx]

**­­­Supplementary Methods**

**Caspase Activation Assay**

Cells were treated with AZD-7762 (3 M) for 42 hr and caspase-3/7 activity was measured with the Caspase-Glo assay kit (Promega). Briefly, 96 well plates containing cells were removed from the incubator and 100 l of Caspase-Glo reagent was added to each well for 30 mins at room temperature. Luminescence was measured with an EnVisionTM (PerkinElmer) plate reader.

**Bliss Analysis**

Bliss expectation was calculated as previously described (1). Briefly, The Bliss expectation was calculated with the equation (A + B) − (A × B), in which A and B are the fractional growth inhibitions induced by agents A and B at a given dose, respectively. The difference between Bliss expectation and the observed growth inhibition of the combination of agents A and B at the same dose is the "Delta Bliss excess." Delta Bliss values were summed across the dose matrix to generate the Bliss sum.

**References**

1. Wilson, C., Ye, X., Pham, T., Lin, E., Chan, S., McNamara, E., Neve, R.M., Belmont, L., Koeppen, H., Yauch, R.L.*, et al.* (2014). AXL inhibition sensitizes mesenchymal cancer cells to antimitotic drugs. Cancer Res *74*, 5878-5890.

**Supplementary Figures**

**Supplementary Figure S1.**

Gö6976 selectively inhibits osteosarcoma cell growth through Chk1 inhibition in a p53-independent manner

**A,** Inhibitory effects of Gö6976and sotrastaurin on PKC signaling. U-2 OS cells were treated with DMSO (DM), Gö6976or sotrastaurin for the indicated times and cell lysates were subjected to immunoblotting using anti-phospho-PKC substrate motif antibody. -Actin served as a loading control (*n*=3).

**B,** Growth inhibitory effects of Gö6976and sotrastaurin on osteosarcoma cells. Gö6976-sensitive U-2 OS and 143B PML BK TK (green), and Gö6976-refractory MG63 cells (red) were treated with Gö6976or sotrastaurin at various concentrations for 72 hr. Cell viability was measured by Cell Titer-Glo. Error bars represent mean ± SEM (*n*=3).

**C,** Summary of KinAffinity kinome profiling of Gö6976. Cut-off of Kd < 1M.

**D**, Chk1 and Chk2 expression was detected by immunoblotting using anti-Chk1 and anti-Chk2 antibodies. -Actin served as a loading control (*n*=3).

**E,** Caspase-3/-7 activation in AZD-7762-treated osteosarcoma cells. Gö6976-sensitive (green) and Gö6976-refractory (red) osteosarcoma cells were treated with DMSO or AZD-7762 (1 M) for 48 hr. Caspase activity was measured by Caspase-3/7-Glo. Error bars represent mean ± SEM (*n*=3).

**F,** U-2 OS cells were exposed to a serial dilution of Gö6976 or GDC-0425 for 6 hr. pChk1 at serine 345, cdc25A, pp53 at serine 15, or pH2A.X at serine 139 (H2AX) was detected by immunoblotting with the indicated antibodies. -Actin served as a loading control (*n*=3).

**G,** Synergistic cell killing activity by a gemcitabine/GDC-0425 combination. Drug matrix heat-map grids illustrate growth inhibition and delta Bliss values for gemcitabine in combination with GDC-0425 for U-2 OS cells. Positive Bliss sum indicates that the combination treatment is synergistic (*n*=3).

**H,** Growth inhibitory effects of GDC-0425. U-2 OS and 143B PML BK TK were treated with GDC-0425 at various concentrations for 72 hr. Cell viability was measured by Cell Titer-Glo. Error bars represent mean ± SEM (*n*=3).

**Supplementary Figure S2.**

Relationship between GDC-0425 sensitivity and *Chk1* expression in cell lines derived from the indicated tissue types

**A,** Tissue distribution of GDC-0425-sensitive cells (IC50 < 3 M). Percentage of sensitive cells from each tissue is shown.

**B,** Chk1 and Chk2 expression was detected by immunoblotting with anti-Chk1 or anti-Chk2 antibodies in the GDC0425-sensitive and -refractory group of ovarian cancer cell lines. -Actin served as a loading control. GDC0425-sensitive (IC50 < 3 M) or -refractory (IC50 > 3 M) cell lines were color-coded as green or red, respectively (*n*=3).

**C** and **D,** Comparison of *Chk1* RNA expression in GDC-0425-sensitive (green, IC50 < 3 M) and -refractory cells (red, IC50 > 3 M) derived from breast (C), lung, brain, and skin cancers (D).

**E** and **F,** Scatter plots of table G (E) and table H and J (F)

**G,** A summary table indicating GDC-0425 IC50s and corresponding *Chk1* expression in GDC-0425-sensitive (IC50 < 3 M) and -refractory cells (IC50 > 3 M) ovarian cancer cell lines in Figure 2A.

**H,** A summary table indicating *Chk1* expression in breast subtypes in Figure 2C.

**I,** Chk1, Chk2, and Her2 expression was assessed by immunoblotting in basal, Her2, and luminal breast cancer cell lines. -Actin served as a loading control. GDC0425-sensitive (IC50 < 3 M) or -refractory (IC50 > 3 M) cell lines were color-coded as green or red, respectively.

**J,** A summary table indicating GDC-0425 IC50s of breast subtypes in Figure 2E.

**Supplementary Figure S3.**

Ras-MEK signaling is associated with Chk1 dependency

**A,** A summary table indicating GDC-0425 sensitivity and *Chk1* RNA expression for 12 GDC-0425-sensitive and -refractory breast cancer cell lines used for GSEA in Figure 3A.

**B,** A heatmap of genes of MAPK pathway signature between GDC-0425 sensitive (green) and refractory (red) groups. A hierarchical unsupervised clustering with Euclidean distance to order samples and genes. Expression values are log2(RPKM) values z-scored per gene.

**C,** Chk1-dependent (green) or -independent (red) breast cancer cells were treated with GDC0425 for 24 hr. The indicated proteins were detected by immunoblotting. -Actin served as a loading control (*n*=3).

**D,** GDC-0425 IC50s of GDC-0425-sensitive (IC50 < 3 M) and -refractory cells (IC50 > 3 M) ovarian cancer cell lines.

**E,** Identification of upstream regulators using GSEA followed by Ingenuity upstream regulator analysis in Chk1-dependent ovarian cancer cells.

**F,** JIMT-1 cells were transfected with the indicated siRNAs for 72 hr and immunoblotting was performed to detect the indicated proteins. -Actin served as a loading control. Chk1 expression change was assessed by densitometric analysis.

**G,** Cells were treated with either cobimetinib or cycloheximide alone or together for one to three days. Chk1 expression was measured by immunoblotting. -Actin served as a loading control. Chk1 expression change was assessed by densitometric analysis.

**H**, siRNAs targeting MEK1 and 2 were transfected in JIMT-1 cells for 48 hr followed by GDC-0425 treatment for 72 hr. Cell viability was measured by Cell Titer-Glo. Error bars represent mean ± SD (*n*=3). Gene silencing of MEK1 was assessed by immunobloting -Actin served as a loading control.

**Supplementary Figure S4.**

Feedback activation of Ras-MEK by Chk1 inhibition

**A,** GDC-0425-sensitive (green) or refractory (red) cells were treated with 3 M GDC-0425 for various times. Immunoblotting was performed to detect the indicated proteins. -Actin served as a loading control (*n*=3).

**B,** U-2 OS cells were treated with DMSO or Gö6976 and cell lysates were subjected to the phospho-kinase array as described in Fig. 4C. pERK is indicated by the red boxes.

**Supplementary Figure S5.**

BT-549 cells were treated with either GDC-0425 or cobimetinib alone or combination for 24 hr. Immunoblotting was performed to detect the indicated proteins. -Actin served as a loading control (*n*=3).


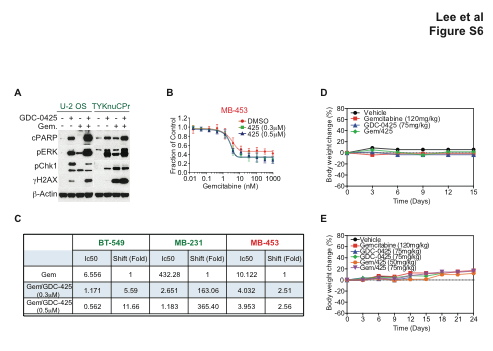


**Supplementary Figure S6.**

Synergistic anti-tumor growth activity by gemcitabine/GDC-0425 combination treatment in Chk1-dependent cancer cells

**A,** U-2 OS and TYK-nu.CP-r cells were treated with either GDC-0425 (3 M) or gemcitabine (1 M) alone or combination for 24 hr. The indicated proteins were detected by immunoblotting. -Actin served as a loading control.

**B,** MDA-MB453 cell were treated with gemcitabine alone or together with GDC-0425 for 72 hr. Cell viability was assessed by Cell Titer-Glo. Error bars represent mean ± SD (*n*=3).

**C,** A summary table of Fig. 6B and S6B indicates IC50s and fold changes in IC50 shift.

**D** and **E,** Body weight of mice bearing 143B PML BK TK and HCC1806 xenografts was measured at the indicated time points.
